# Supplementary material
Source: Frontiers journal article supplement (https://www.frontiersin.org/articles/542837)
Supplement: Table_1.doc [file Table_1.doc]

**APPENDIX Table 1 |** List of 205 banks

| **number** | **Bank’s name** | **number** | **Bank’s name** |
| --- | --- | --- | --- |
| 1 | Anhui Qingyang Rural Commercial Bank | 104 | JPMorgan Chase Bank (China) |
| 2 | Anhui Tongcheng Rural Commercial Bank | 105 | Nanchong City Commercial Bank |
| 3 | Anqing rural commercial bank | 106 | Nanhai Rural Commercial Bank |
| 4 | Bank of Anshan | 107 | Bank of Nanjing |
| 5 | ANZ (China) | 108 | South business (China) |
| 6 | Contractor bank | 109 | Bank of Inner Mongolia |
| 7 | Beijing Rural Commercial Bank | 110 | Bank of Ningbo |
| 8 | Bank of Beijing | 111 | Bank of Ningxia |
| 9 | Bank of Bohai | 112 | Agricultural Development Bank |
| 10 | Bank of Cangzhou | 113 | Panzhihua commercial bank |
| 11 | Bank of Changshu | 114 | Pangu China |
| 12 | Chaoyang bank | 115 | Peixian Rural Commercial Bank |
| 13 | Chengdu Rural Commercial Bank | 116 | Pengcheng Rural Commercial Bank |
| 14 | Bank of Chengdu | 117 | Ping An Bank |
| 15 | Bank of Chengde | 118 | Pudong Development Bank |
| 16 | Chizhou Jiuhua Rural Commercial Bank | 119 | Qilu Bank |
| 17 | Cixi Rural Commercial Bank | 120 | Qi Shang bank |
| 18 | Bank of Dazhou | 121 | Corporate banking (China) |
| 19 | Dahua Bank (China) | 122 | Qidong rural commercial bank |
| 20 | Dalian rural commercial bank | 123 | Qinhuangdao bank |
| 21 | Bank of Dalian | 124 | Bank of Qingdao |
| 22 | Datong bank | 125 | Bank of Qinghai |
| 23 | Bank of Dandong | 126 | Qujing commercial bank |
| 24 | Deqing Rural Commercial Bank | 127 | Bank of Quanzhou |
| 25 | Great Wall Huaxi bank | 128 | Rizhao bank |
| 26 | Deutsche Bank China | 129 | Swiss bank |
| 27 | Bank of Dongguan | 130 | Mizuho bank |
| 28 | East Asia China | 131 | Sumitomo Mitsui (China) |
| 29 | Bank of Dongying | 132 | Xiamen International Bank |
| 30 | Ordos Rural Commercial Bank | 133 | Xiamen Rural Commercial Bank |
| 31 | Feixi Rural Commercial Bank | 134 | Xiamen Bank |
| 32 | Foshan Rural Commercial Bank | 135 | Shanghai Rural Commercial Bank |
| 33 | Fujian strait bank | 136 | Bank of Shanghai |
| 34 | Fujian Nan'an rural cooperative bank | 137 | Bank of Shaoxing |
| 35 | Fujian Zhangzhou Rural Commercial Bank | 138 | Shengjing Bank |
| 36 | Bank of Fuxin | 139 | Shizuishan bank |
| 37 | Fubon bank | 140 | Shucheng Rural Commercial Bank |
| 38 | fudian bank | 141 | Shuyang Rural Commercial Bank |
| 39 | Fuyang Rural Commercial Bank | 142 | Shunde Rural Commercial Bank |
| 40 | China Everbright Bank | 143 | Sichuan Tianfu bank |
| 41 | Guangdong Huaxing bank | 144 | Bank of Suzhou |
| 42 | Guangdong Nanyue bank | 145 | Suining Rural Commercial Bank |
| 43 | Guangdong Development Bank | 146 | Bank of Suining |
| 44 | Guangxi Beibu Gulf Bank | 147 | Bank of Taizhou |
| 45 | Guangzhou rural commercial bank | 148 | Taicang Rural Commercial Bank |
| 46 | Bank of Guangzhou | 149 | Bank of Tai'an |
| 47 | Bank of Guiyang | 150 | Bank of Tangshan |
| 48 | Guilin bank | 151 | Tianjin Rural Commercial Bank |
| 49 | China Development Bank | 152 | Bank of Tianjin |
| 50 | National (China) | 153 | Weihai commercial bank |
| 51 | Harbin Bank | 154 | Bank of Weifang |
| 52 | Haian Rural Commercial Bank | 155 | Wenling Rural Commercial Bank |
| 53 | Bank of Handan | 156 | Bank of Wenzhou |
| 54 | Hanya Bank (China) Co., Ltd | 157 | Bank of Wuhai |
| 55 | HanKou Bank | 158 | Bank of Urumqi |
| 56 | Hangzhou United Bank | 159 | Wuxi Rural Commercial Bank |
| 57 | Bank of Hangzhou | 160 | Wujiang rural commercial bank |
| 58 | Hefei Science and technology rural commercial bank | 161 | Wuhan Rural Commercial Bank |
| 59 | Bank of Hebei | 162 | Bank of Xi'an |
| 60 | Heng Feng bank | 163 | Xining Rural Commercial Bank |
| 61 | Bank of Hengshui | 164 | Xiaoshan Rural Commercial Bank |
| 62 | Huludao bank | 165 | New Korea China |
| 63 | Bank of Hubei | 166 | Xinhui Rural Commercial Bank |
| 64 | Bank of Huzhou | 167 | Xinyi Rural Commercial Bank |
| 65 | Huarong Xiangjiang bank | 168 | Bank of Xingtai |
| 66 | Bank of China | 169 | Industrial Bank |
| 67 | Huaxia Bank | 170 | Yantai Bank |
| 68 | Huanghe Rural Commercial Bank | 171 | Yibin commercial bank |
| 69 | huishang bank | 172 | Yiwu Rural Commercial Bank |
| 70 | HSBC China | 173 | Yinzhou Bank |
| 71 | Bank of Jilin | 174 | Bank of Yingkou |
| 72 | Bank of Jining | 175 | Youli (China) |
| 73 | Jiangdu Rural Commercial Bank | 176 | Yuhang Rural Commercial Bank |
| 74 | Jiangmen Ronghe Rural Commercial Bank | 177 | Yuhuan Rural Commercial Bank |
| 75 | Jiangnan Rural Commercial Bank | 178 | Yuexi Rural Commercial Bank |
| 76 | Jiangsu Jiangyin Rural Commercial Bank | 179 | Yunnan Hongta bank |
| 77 | Jiangsu Suining Rural Commercial Bank | 180 | Standard Chartered China |
| 78 | Bank of Jiangsu | 181 | Zhangjia Hong Kong |
| 79 | Jiangsu Changjiang commercial bank | 182 | Bank of Changan |
| 80 | Bank of Jiangyin | 183 | Bank of Changsha |
| 81 | Jiangyan Rural Commercial Bank | 184 | China Merchants Bank |
| 82 | Bank of Communications | 185 | Zhejiang Chouzhou commercial bank |
| 83 | Jiaojiang rural cooperative bank | 186 | Zhejiang Mintai Commercial Bank |
| 84 | Bank of Jinhua | 187 | Zhejiang Tailong commercial bank |
| 85 | Bank of Jinzhou | 188 | Zhejiang Merchants Bank |
| 86 | Export Import Bank | 189 | Bank of Zhengzhou |
| 87 | Bank of Jincheng | 190 | ICBC |
| 88 | Jinjiang Rural Commercial Bank | 191 | China Construction Bank |
| 89 | Shanxi Merchants Bank | 192 | China Minsheng Bank |
| 90 | Jingxian Rural Commercial Bank | 193 | the Agricultural Bank of China |
| 91 | Jingdezhen Rural Commercial Bank | 194 | Bank of China |
| 92 | Bank of Jiujiang | 195 | China Post Savings Bank |
| 93 | Bank of Kunlun | 196 | Zhongshan Rural Commercial Bank |
| 94 | Kunshan Rural Commercial Bank | 197 | CITIC Bank |
| 95 | Lai Hang Bank | 198 | Zhongyuan bank |
| 96 | Bank of Lanzhou | 199 | Chongqing Rural Commercial Bank |
| 97 | Leshan commercial bank | 200 | Chongqing Three Gorges bank |
| 98 | Liangshan commercial bank | 201 | Bank of Chongqing |
| 99 | Pro bank | 202 | Zhuhai China Resources Bank |
| 100 | Bank of Liuzhou | 203 | Zhuhai Rural Commercial Bank |
| 101 | Bank of Longjiang | 204 | Zijin Rural Commercial Bank |
| 102 | Luzhou commercial bank | 205 | Bank of Zigong |
| 103 | Bank of Luoyang |  |  |
